# Supplementary material for: Ni80Fe20 nanotubes with optimized spintronic functionalities prepared by atomic layer deposition
Source: Royal Society of Chemistry journal article supplement (doi:10.1039/d1nr02291a), 2021-01-01
Supplement: d1nr02291a1.pdf [file d1nr02291a1.pdf]

Supplementary information

### Ni<sub>80</sub>Fe<sub>20</sub> Nanotubes with Optimized Spintronic Functionalities Prepared by Atomic Layer Deposition

M. C. Giordano<sup>1</sup>, S. R. Escobar Steinvall<sup>2</sup>, S. Watanabe<sup>1</sup>, A. Fontcuberta i Morral<sup>2,3</sup>, and D. Grundler<sup>1,4</sup>

<sup>1</sup> Institute of Materials, Laboratory of Nanoscale Magnetic Materials and Magnonics, Ecole Polytechnique Federale de Lausanne, School of Engineering, 1015 Lausanne, Switzerland

<sup>2</sup> Institute of Materials, Laboratory of Semiconductor Materials, Ecole Polytechnique Federale de Lausanne, School of Engineering, 1015 Lausanne, Switzerland

<sup>3</sup> Institute of Physics, School of Natural Sciences, Ecole Polytechnique Federale de Lausanne, 1015 Lausanne, Switzerland

<sup>4</sup> Institute of Microengineering, School of Engineering, Ecole Polytechnique Federale de Lausanne, 1015 Lausanne, Switzerland

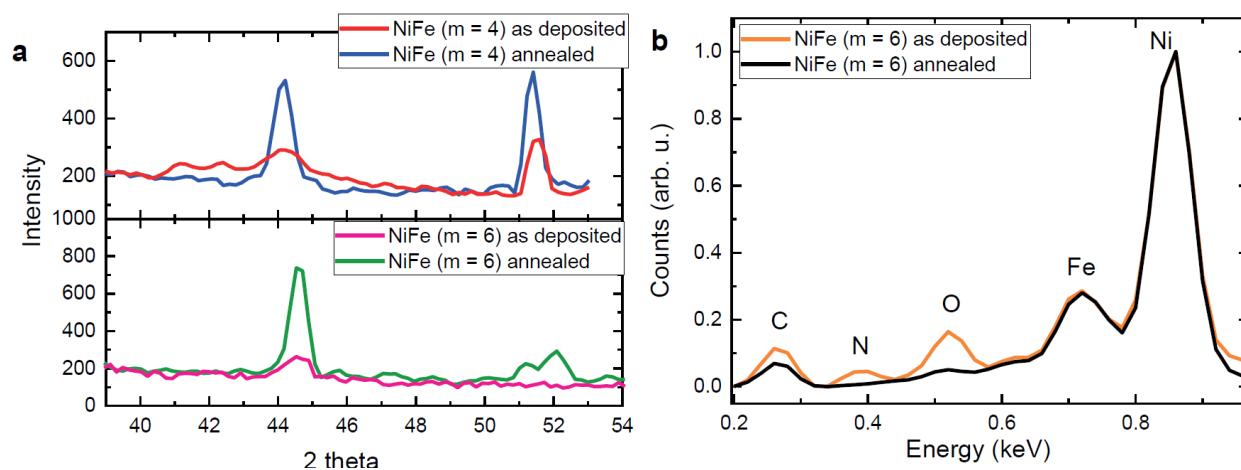

**Figure S1.** (a) X-Ray diffractograms of the samples prepared with  $m = 4$  and  $m = 6$  in their as deposited and annealed state. (b) Energy dispersive spectroscopy of the NiFe sample prepared with  $m = 6$  as deposited and annealed in the energy range 0.2-1 keV. The annealing treatment was performed at 380 °C.

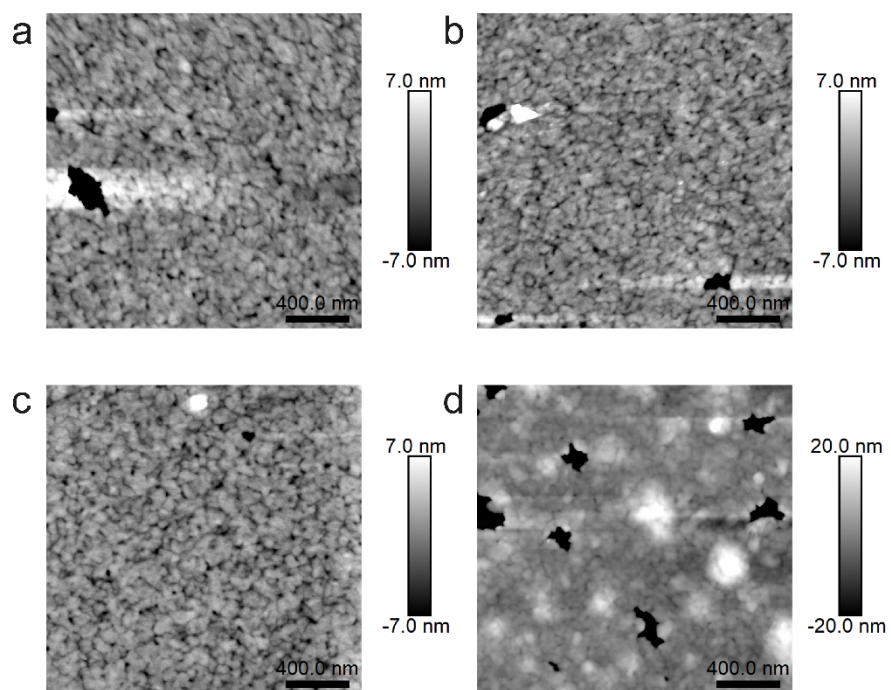

**Figure S2.** Atomic force microscopy performed on a  $2\ \mu\text{m} \times 2\ \mu\text{m}$  area of samples prepared with (a)  $m = 4$ , (b)  $m = 5$ , (c)  $m = 6$ , and (d)  $m = 7$  on bare silicon substrates, after the annealing treatment at  $380\ ^\circ\text{C}$ .

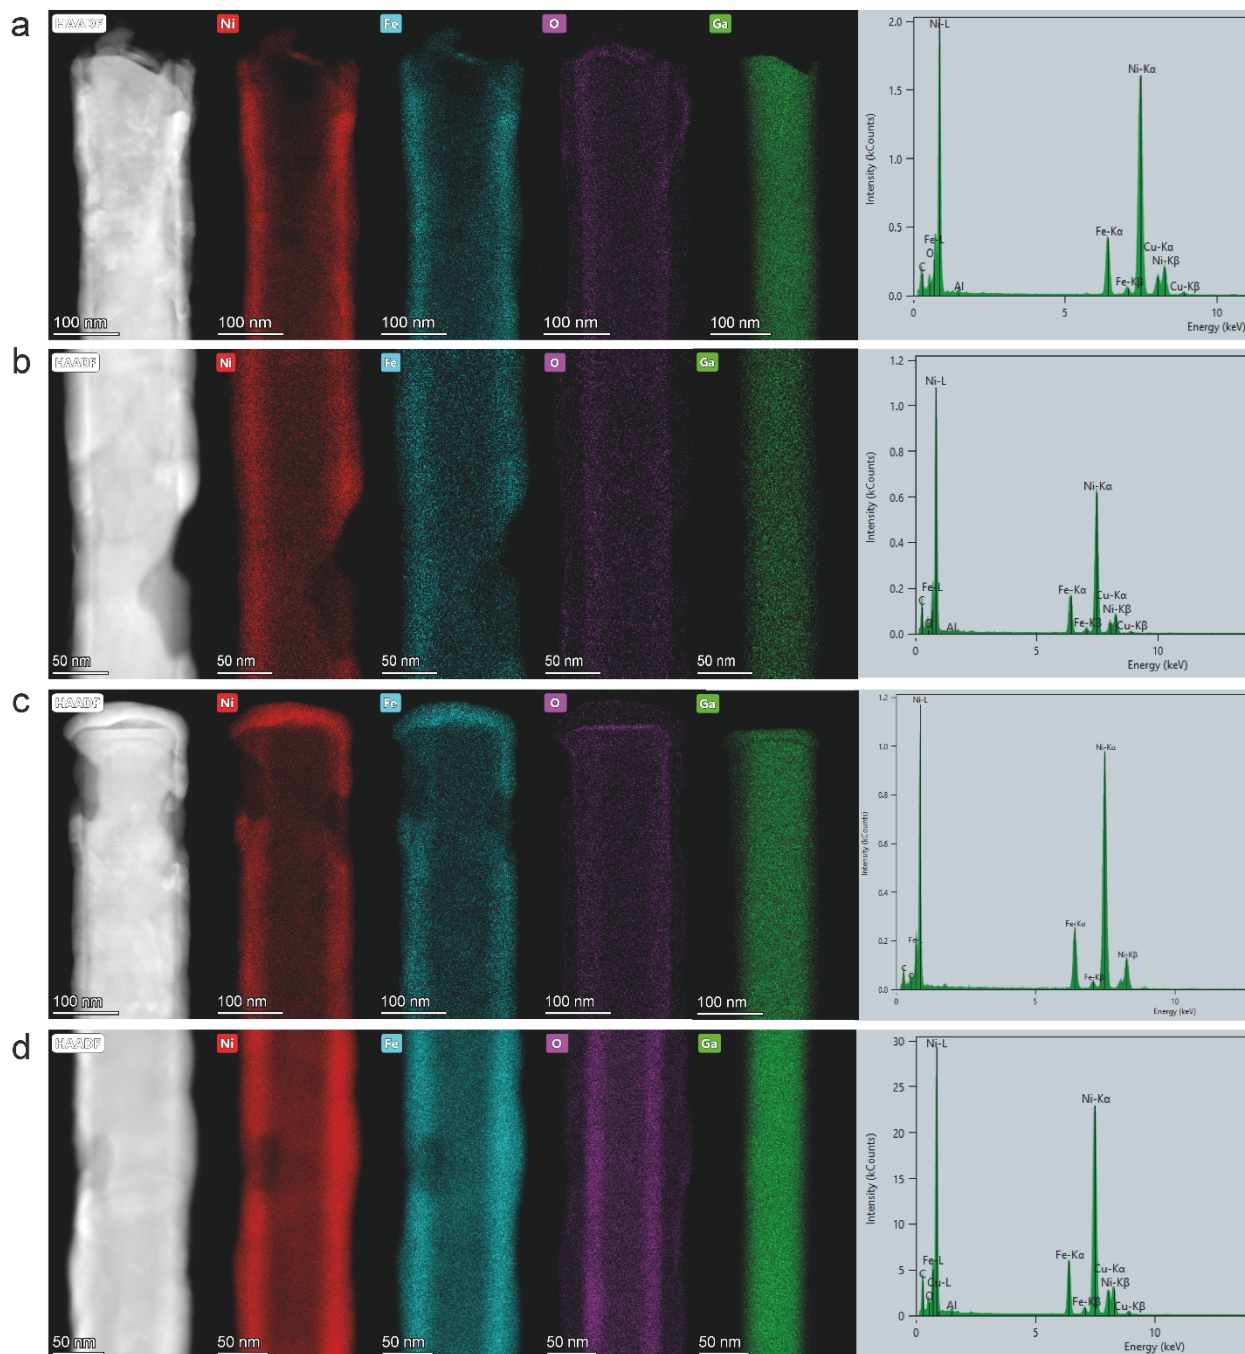

**Figure S3.** HADDF images and elemental maps of NiFe nanotube samples (a-d) NT\_S1-4, prepared with Ni:Fe pulse ratio  $m = 6$ , annealed at 380 °C, and corresponding energy dispersive spectroscopy analysis of the external shell. The composition and NiFe shell thickness values measured for the four nanotubes are summarized in Table S1.

**Table S1.** Thickness and compositional values of NiFe NTs prepared by ALD with Ni:Fe pulse ratio  $m = 6$ . The values were extrapolated from STEM-EDX analysis.

| <b>Sample</b>   | <b>Thickness far from holes (nm)</b> | <b>Ni (at%) in NiFe ratio</b> | <b>Fe (at%) in NiFe ratio</b> | <b>O (at%) in the shell</b> |
|-----------------|--------------------------------------|-------------------------------|-------------------------------|-----------------------------|
| NT1 (main text) | 21.1                                 | 80.2                          | 19.8                          | 3.5                         |
| NT_S1           | 23.3                                 | 80.7                          | 19.3                          | 3.4                         |
| NT_S2           | 20.2                                 | 80.5                          | 19.5                          | 3.6                         |
| NT_S3           | 23.3                                 | 80.7                          | 19.3                          | 3.5                         |
| NT_S4           | 22.1                                 | 80.8                          | 19.2                          | 3.5                         |
| <b>Average</b>  | $21.6 \pm 1.2$                       | $80.4 \pm 0.3$                | $19.6 \pm 0.3$                | $3.5 \pm 0.1$               |

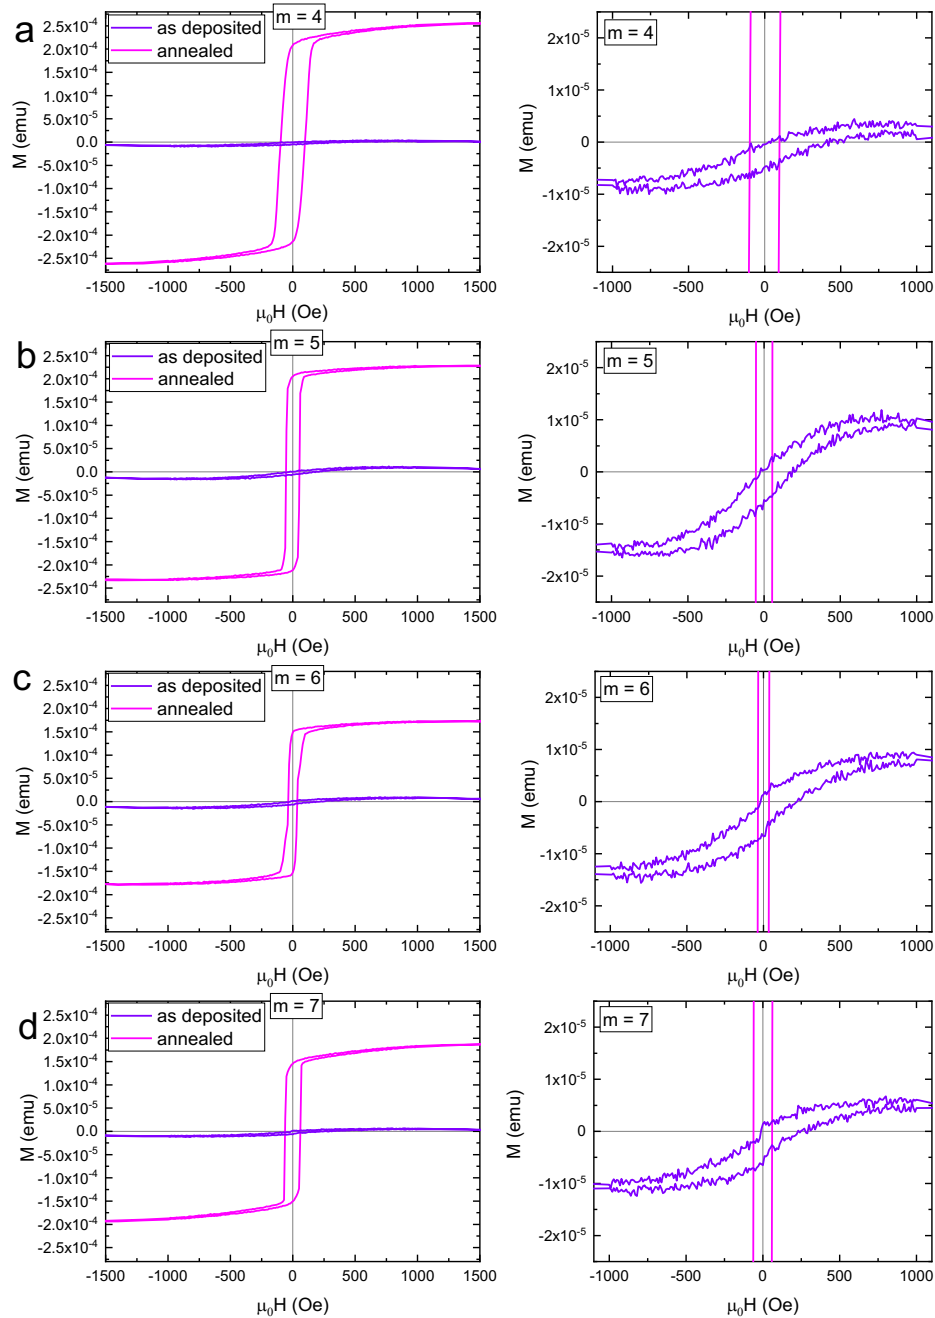

**Figure S4.** Hysteresis curves measured with a VSM, at room temperature, of as deposited (purple curve) and annealed (magenta curve) NiFe thin films prepared by ALD, using Ni:Fe pulse ratio (a)  $m = 4$ , (b)  $m = 5$ , (c)  $m = 6$  and (d)  $m = 7$ . The hysteresis curves were acquired with an applied field oriented at  $0^\circ$  degrees in the plane of the sample. On the right panel the same curves are magnified.

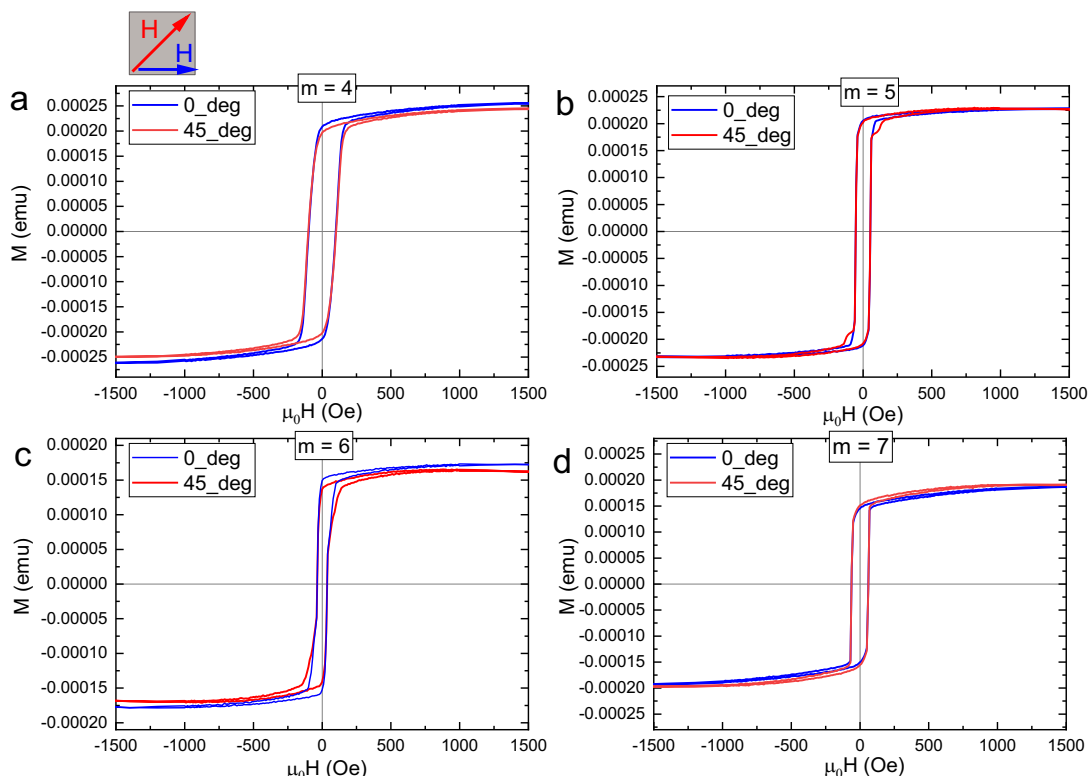

**Figure S5.** Hysteresis curves measured with a VSM at room temperature of annealed NiFe thin films prepared by ALD, using Ni:Fe pulse ratio (a)  $m = 4$ , (b)  $m = 5$ , (c)  $m = 6$  and (d)  $m = 7$ . The blue (red) curves were acquired with an applied field oriented at  $0^\circ$  ( $45^\circ$ ) degrees in the plane of the sample.

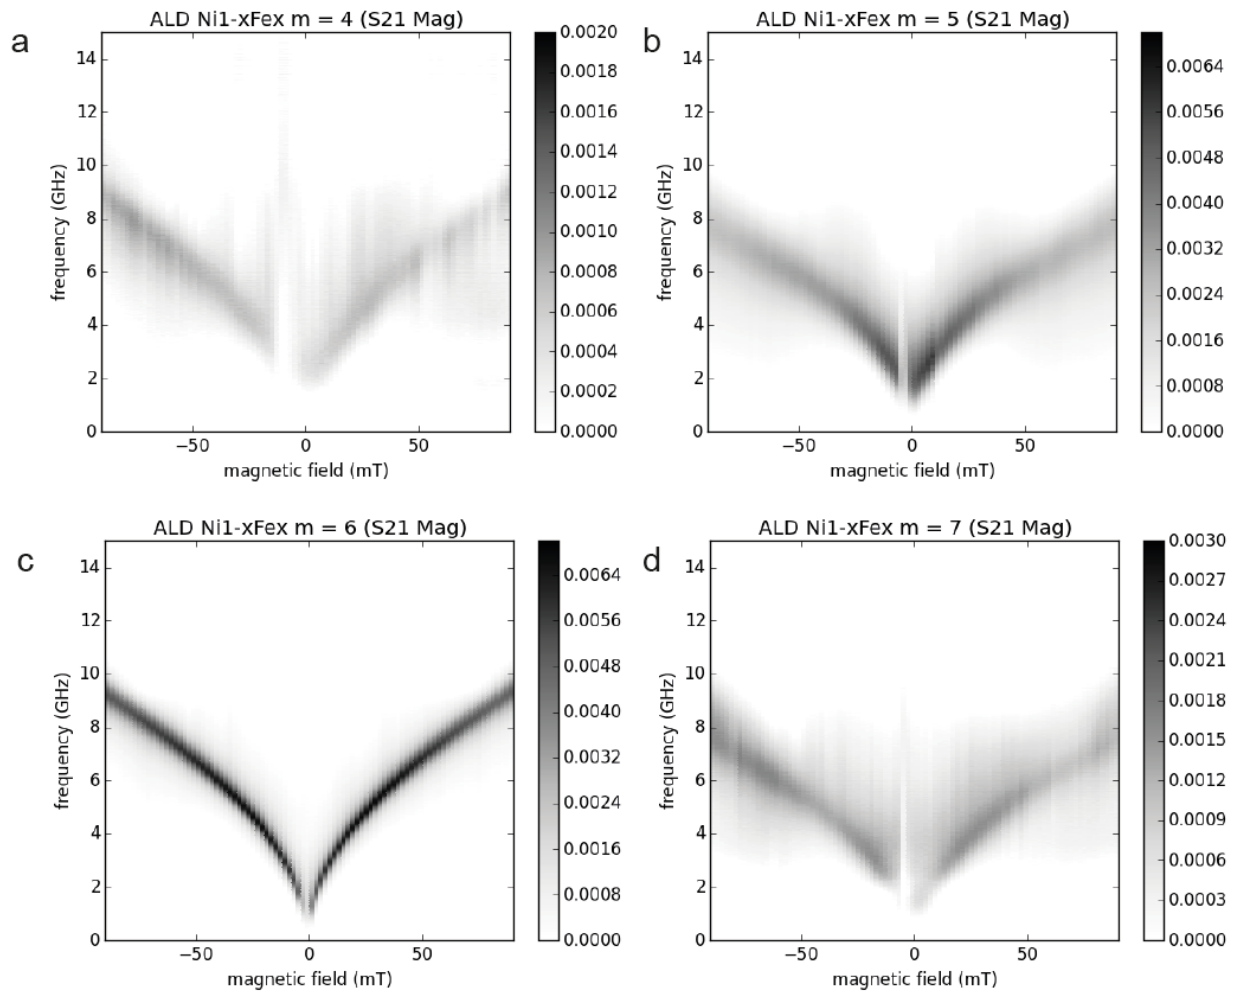

**Figure S6.** VNA-FMR measurements of annealed NiFe thin films prepared by ALD, using Ni:Fe pulse ratio (a)  $m = 4$ , (b)  $m = 5$ , (c)  $m = 6$  and (d)  $m = 7$ . The resonance measurements were acquired while sweeping the magnetic field from 90 to -90 mT in the plane of the sample.

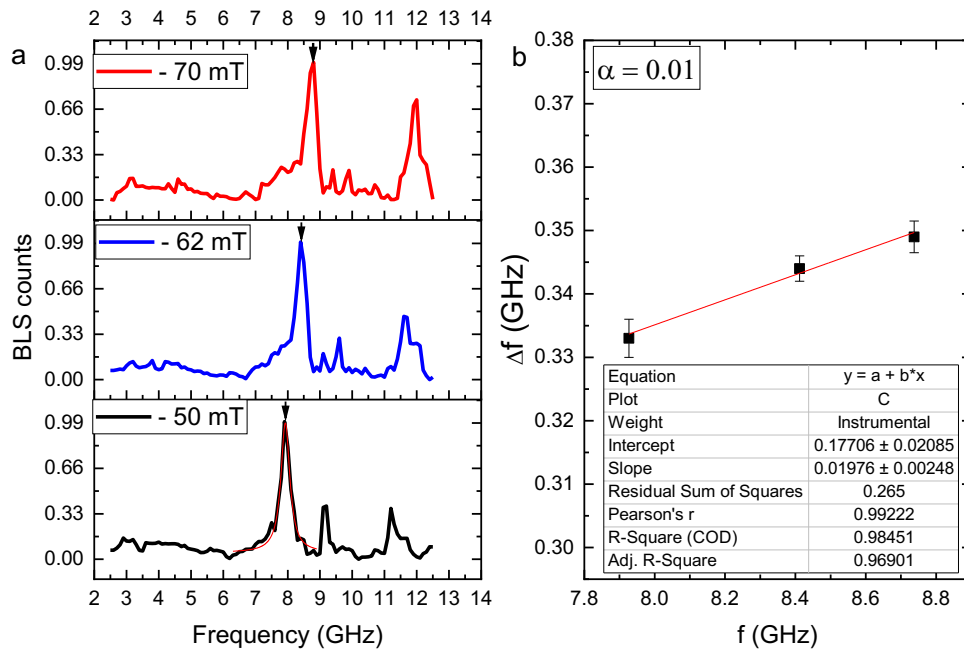

**Figure S7.** (a) BLS spectra detected, at different applied static magnetic fields, on an individual permalloy NT prepared by PEALD using Ni : Fe pulse ratio  $m = 6$ . Black arrows indicate the peak (eigenmode) whose linewidth was used to assess the NT damping parameter. (b) Linewidth  $\Delta f$  plotted as function of the resonance frequency of the mode selected. The data are fitted with a linear function whose slope is twice the Gilbert damping parameter  $\alpha$ , that is found to be 0.01 consistent with the VNA-FMR data.
